# Supplementary material for: High density lipoproteins mediate in vivo protection against staphylococcal phenol-soluble modulins
Source: PubMed Central journal article supplement (PMC8319287; doi:10.1038/s41598-021-94651-1), 2021-07-28
Supplement: 41598_2021_94651_MOESM1_ESM.pdf [file 41598_2021_94651_MOESM1_ESM.pdf]

Supplementary information

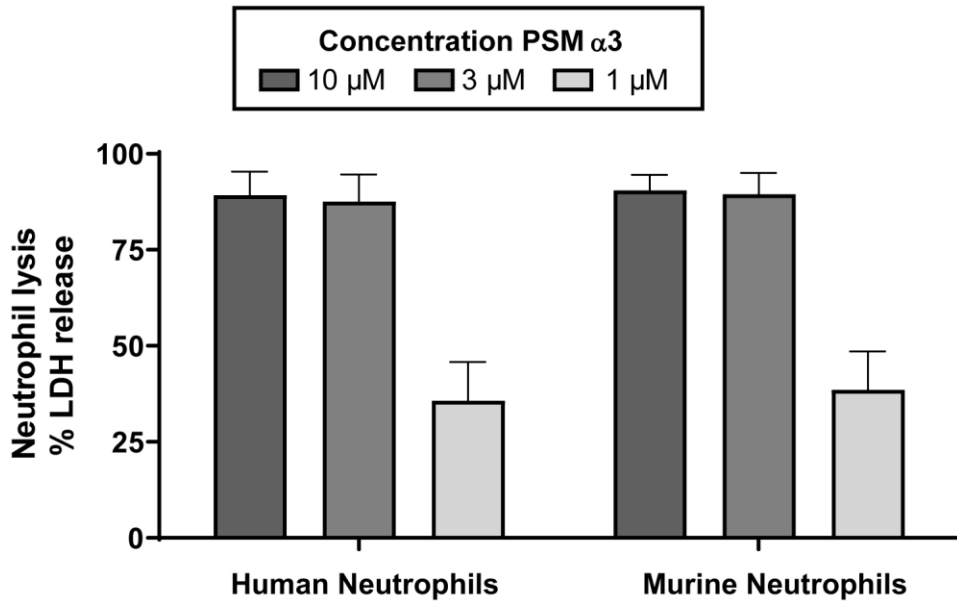

**S Figure 1: No difference in PSM induced lyses between human and murine neutrophils.** Dose-dependent neutrophil lysis induced by synthetic PSMα3. Neutrophils were isolated from healthy human donors or murine bone marrow. Neutrophil lysis was measured via LDH release. Data represent means ± SEM of three independent experiments.

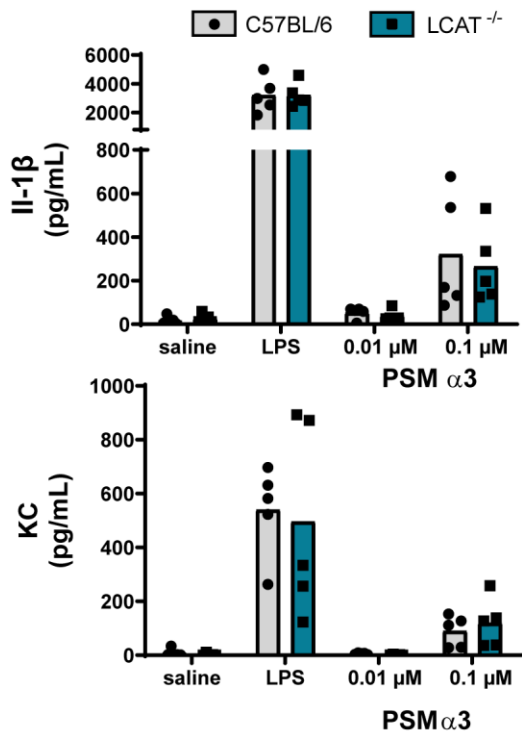

**S Figure 2: Peritoneal cells isolated from C57BL/6 or LCAT<sup>-/-</sup> mice produce equal amount of pro-inflammatory cytokines in response to stimulation with PSM.** *In vitro* stimulation of peritoneal lavage cells isolated from C57BL/6 or LCAT<sup>-/-</sup> mice with LPS (50ng/ml) or synthetic PSM $\alpha$ 3. Levels of IL-1 $\beta$  and KC were measured by ELISA. Each dot represents an individual mouse, data compiled from 2 individual experiments.
